# Supplementary material for: Plastrum Testudinis Extracts Promote NSC Differentiation into Dopaminergic Neuron by Regulating the Interaction of TET1 and FoxA2
Source: Hindawi journal article supplement (doi:10.1155/2020/9104135), 2020-01-01
Supplement: f1 [file 9104135.f1.pdf]

**Table1 the description of the statistical analyses for in vivo experiments( $\bar{x} \pm s$ ).**

| Group                | TH             | 5hmC           | TET1            | FoxA2           |
|----------------------|----------------|----------------|-----------------|-----------------|
| Blank Control group  | 11.20 ± 0.82   | 4.17 ± 0.18    | 17.77 ± 2.00    | 25.29 ± 2.23    |
| Sham-operation group | 11.11 ± 0.90   | 4.10 ± 0.19    | 16.26 ± 1.90    | 25.39 ± 1.85    |
| PD Models group      | 2.80 ± 0.56*** | 2.14 ± 0.20*** | 7.93 ± 1.00***  | 12.62 ± 0.60*** |
| Positive-drug group  | 4.33 ± 1.02ns  | 3.25 ± 0.12### | 16.86 ± 0.12### | 21.16 ± 0.88### |
| Low-dose drug group  | 7.44 ± 0.85### | 3.99 ± 0.21### | 17.83 ± 0.68### | 28.16 ± 2.13### |
| High-dose drug group | 9.50 ± 0.53### | 4.81 ± 0.60### | 24.80 ± 1.08### | 32.56 ± 2.13### |

Notes: Blank Control group vs PD Models group: P1, PD Models group vs Positive-drug group: P2, PD Models group vs Low-dose drug group: P3, PD Models group vs High-dose drug group: P4. TH: P1=0.0001, P2=0.0806, P3=0.0001, P4=0.0001. 5hmC: P1=0.0001, P2=0.0002, P3=0.0001, P4=0.0001. TET1: P1=0.0001, P2=0.0001, P3=0.0001, P4=0.0001. FoxA2: P1=0.0001, P2=0.0001, P3=0.0001, P4=0.0001. \*\*\*P < 0.01 compared with Blank Control, ###P < 0.01 compared with PD Model. ns: not significant, P: p-values, means ± standard deviations:  $\bar{x} \pm s$ .

**Table2 the description of the statistical analyses for Figure2A.**

| Group              | TH( $\bar{x} \pm s$ ) | p-values(compare with PTE(0 $\mu$ g/ml)) |
|--------------------|-----------------------|------------------------------------------|
| PTE(0 $\mu$ g/ml)  | 1.00 ± 0.02           |                                          |
| PTE(3 $\mu$ g/ml)  | 1.05 ± 0.06           | 0.2868                                   |
| PTE(30 $\mu$ g/ml) | 1.93 ± 0.07***        | 0.0001                                   |

Notes: \*\*\*P < 0.01.

**Table3 the description of the statistical analyses for Figure2B.**

| Group              | TH( $\bar{x} \pm s$ ) | p-values(compare with control) |
|--------------------|-----------------------|--------------------------------|
| control            | 1.01 ± 0.09           |                                |
| PTE(30 $\mu$ g/ml) | 2.31 ± 0.55***        | 0.0002                         |

Notes: \*\*\*P < 0.01.

**Table4 the description of the statistical analyses for Figure3D-F( $\bar{x} \pm s$ ).**

| Group                    | TET1(Total protein) | TET1(Nuclear protein) | TET1(mRNA)     |
|--------------------------|---------------------|-----------------------|----------------|
| control                  | 0.99 ± 0.11         | 1.00 ± 0.07           | 0.99 ± 0.06    |
| PTE                      | 1.45 ± 0.12***      | 1.49 ± 0.10***        | 1.22 ± 0.08*** |
| p-values(PTE vs control) | 0.0001              | 0.0001                | 0.0001         |

Notes: \*\*\*P < 0.01.

**Table5 the description of the statistical analyses for Figure4A,C,D( $\bar{x} \pm s$ ).**

| Group                    | FoxA2(Total protein) | FoxA2(Nuclear protein) | FoxA2(mRNA)    |
|--------------------------|----------------------|------------------------|----------------|
| control                  | 0.98 ± 0.09          | 1.00 ± 0.03            | 0.96 ± 0.12    |
| PTE                      | 1.21 ± 0.04***       | 1.29 ± 0.06***         | 1.72 ± 0.24*** |
| p-values(PTE vs control) | 0.0003               | 0.0001                 | 0.0001         |

Notes: \*\*\*P < 0.01.

**Table6 the description of the statistical analyses for Figure5C( $\bar{x} \pm s$ ).**

| Group   | TET1/FoxA2     | p-values(PTE vs control) |
|---------|----------------|--------------------------|
| control | 1.00 ± 0.03    |                          |
| PTE     | 1.43 ± 0.03*** | 0.0001                   |

Notes: \*\*\*P < 0.01.

**Table7 the description of the statistical analyses for Figure6A( $\bar{x} \pm s$ ).**

| Group      | Tet1           | p-values(compare with NC) |
|------------|----------------|---------------------------|
| NC         | 1.00 ± 0.09    |                           |
| siTet1_001 | 0.54 ± 0.03*** | 0.0012                    |
| siTet1_002 | 0.53 ± 0.01*** | 0.0009                    |
| siTet1_003 | 0.53 ± 0.03*** | 0.0010                    |

Notes: \*\*\*P < 0.01.

**Table8 the description of the statistical analyses for Figure6B( $\bar{x} \pm s$ ).**

| Group       | Foxa2          | p-values(compare with NC) |
|-------------|----------------|---------------------------|
| NC          | 1.00 ± 0.08    |                           |
| siFoxa2-001 | 0.68 ± 0.19*** | 0.0002                    |
| siFoxa2-002 | 0.56 ± 0.15*** | 0.0001                    |
| siFoxa2-003 | 1.12 ± 0.07    | 0.0088                    |

Notes: \*\*\*P<0.01.

**Table9 the description of the statistical analyses for Figure6C( $\bar{x} \pm s$ ).**

| Group                     | Tet1           | Th             | Foxa2          |
|---------------------------|----------------|----------------|----------------|
| NC                        | 1.00 ± 0.06    | 1.00 ± 0.06    | 1.00±0.06      |
| siTet1                    | 0.52 ± 0.02*** | 0.48 ± 0.06*** | 1.09 ± 0.05 ns |
| p-values(compare with NC) | 0.0002         | 0.0004         | 0.1421         |

Notes: \*\*\*P<0.01, ns: not significant.

**Table10 the description of the statistical analyses for Figure6D( $\bar{x} \pm s$ ).**

| Group      | Th             |
|------------|----------------|
| NC         | 0.99 ± 0.06    |
| siTet1     | 0.62 ± 0.11*** |
| siTet1+PTE | 0.70 ± 0.13 ns |

Notes: NC vs siTet1(P=0.0001<0.01), siTet1 vs siTet1+PTE(P=0.1388>0.05). \*\*\*P<0.01,ns: not significant.

**Table11 the description of the statistical analyses for Figure6E( $\bar{x} \pm s$ ).**

| Group                     | Tet1           | Th             | Foxa2          |
|---------------------------|----------------|----------------|----------------|
| NC                        | 1.00 ± 0.06    | 1.00 ± 0.03    | 1.00±0.09      |
| siFoxa2                   | 0.95 ± 0.09 ns | 0.52 ± 0.00*** | 0.45 ± 0.03*** |
| p-values(compare with NC) | 0.4405         | 0.0000         | 0.0007         |

Notes: \*\*\*P<0.01, ns: not significant.

**Table12 the description of the statistical analyses for Figure6F( $\bar{x} \pm s$ ).**

| Group       | Th             |
|-------------|----------------|
| NC          | 0.97 ± 0.04    |
| siFoxa2     | 0.61 ± 0.09*** |
| siFoxa2+PTE | 0.76 ± 0.11 ns |

Notes: NC vs siFoxa2(P=0.0037<0.01), siFoxa2 vs siTet1+PTE(P=0.1320>0.05). \*\*\*P<0.01,ns: not significant.

## Graphical Abstract

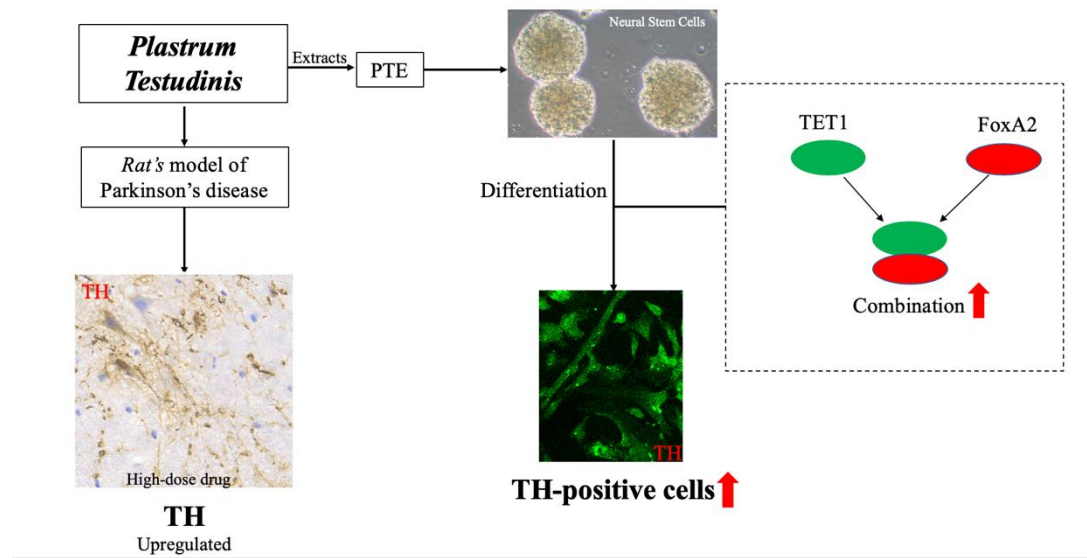

**Keywords:** Parkinson's disease; Plastrum Testudinis; neural stem cells; TET1; FoxA2
